# Supplementary material for: A Novel Role of the Two-Component System Response Regulator UvrY in Enterohemorrhagic Escherichia coli O157:H7 Pathogenicity Regulation
Source: MDPI journal article supplement (doi:10.3390/ijms24032297), 2023-01-24
Supplement: s1 [file s1]

**Table S2.** Strains and plasmids used in this study

| Strains                      | Genotype or description                                                                 | Source or reference |
|------------------------------|-----------------------------------------------------------------------------------------|---------------------|
| G2734                        | Wild-type EHEC O157:H7 EDL933                                                           | ATCC*               |
| $\Delta uvrY$                | <i>uvrY</i> deletion mutant in G2734                                                    | This study          |
| $\Delta ler$                 | <i>ler</i> deletion mutant in G2734                                                     | This study          |
| $\Delta barA$                | <i>barA</i> deletion mutant in G2734                                                    | This study          |
| $\Delta ler\Delta uvrY$      | <i>ler</i> and <i>uvrY</i> double deletion mutant in G2734                              | This study          |
| $\Delta uvrY^+$              | $\Delta uvrY$ containing pTrc99a- <i>uvrY</i>                                           | This study          |
| $\Delta ler\Delta uvrY^+$    | $\Delta ler\Delta uvrY$ double deletion mutant containing pTrc99a- <i>uvrY</i>          | This study          |
| <i>uvrY</i> -6 x His         | BL21(DE3) containing pET28a- <i>uvrY</i>                                                | This study          |
| <i>uvrY</i> -3 x FLAG        | $\Delta uvrY$ containing pTRC99a- <i>uvrY</i> -3×FLAG                                   | This study          |
| Plasmids                     |                                                                                         |                     |
| pKD3                         | Containing a chloramphenicol resistance cassette and the flipase recognition sites, CmR | BfR†                |
| pKD4                         | Containing a kanamycin resistance cassette and the flipase recognition sites, KmR       | BfR†                |
| pKD46                        | Red recombination plasmid, ApR                                                          | Lab collection      |
| pET28a                       | T7 expression vector, KmR                                                               | Lab collection      |
| pTRC99a                      | Expression vector, ApR                                                                  | Lab collection      |
| pTRC99a- <i>uvrY</i> -3×FLAG | pTRC99a carrying <i>uvrY</i> -3x FLAG, ApR                                              | This study          |
| pTRC99a- <i>uvrY</i>         | pTRC99a carrying <i>uvrY</i> , ApR                                                      | This study          |
| pET28a- <i>uvrY</i>          | pET28a carrying <i>uvrY</i> , KmR                                                       | This study          |

\*, ATCC, American Type Culture Collection, Manassas, Virginia, USA. †, BfR,

Beutin Federal institute for Risk Assessment National Reference Laboratory for

*Escherichia coli*, Berlin, Germany.
