# Supplementary material for: A Novel Role of the Two-Component System Response Regulator UvrY in Enterohemorrhagic Escherichia coli O157:H7 Pathogenicity Regulation
Source: MDPI journal article supplement (doi:10.3390/ijms24032297), 2023-01-24
Supplement: s1 [file s1]

**Table S3.** Oligonucleotides used in this study (5'-3')

| Gene                                     | F/R | sequence                                                                                                       |
|------------------------------------------|-----|----------------------------------------------------------------------------------------------------------------|
| Primers for gene mutation                |     |                                                                                                                |
| <i>uvrY</i>                              | F   | CCCTATTTCTGGAGATATTCCT GTAGGCTGGAGCTGCTTCG                                                                     |
| <i>uvrY</i>                              | R   | GCTTTTGCGTCAAAC TGATCACCATATGAATATCCTCCTTAG                                                                    |
| <i>barA</i>                              | F   | CAATTTAACAGTGTGACCTTAATTGTCCCATAACGGAAC TCCG<br>TGTAGGCTGGAGCTGCTTCG                                           |
| <i>barA</i>                              | R   | ACAGCGTCATAAAAAGCCGATTGCTACTCGACAAGACGTCCG<br>CATATGAATATCCTCCTTAG                                             |
| <i>ler</i>                               | F   | TCATTTGATTAATTGTTGGTCCTTCCTGATAAGGTCGCTAATAG<br>CTTAAAATATTAAAGCGTG TAGGCTGGAGCTGCTTCG                         |
| <i>ler</i>                               | R   | CTTTATTTTTTATTATTT CATCTTCCAGCTCAGTTATCGTTATCA<br>TTTAATTATTT CATGCATATGAATATCCTCCTTAG                         |
| Primers for identifying the gene mutants |     |                                                                                                                |
| <i>uvrY</i>                              | F   | TTCGTCGCAGGGCTTACTGTGAAA                                                                                       |
| <i>uvrY</i>                              | R   | TACATCAATTTGCTGGATCTGGGC                                                                                       |
| <i>barA</i>                              | F   | TGCTTCGCTGCTGTAAATCC                                                                                           |
| <i>barA</i>                              | R   | TGCTATTGATACGCACTGGA                                                                                           |
| <i>ler</i>                               | F   | GTGCTGGCTGTAGCTTATGTCC                                                                                         |
| <i>ler</i>                               | R   | GGCTCACAATACTCATCCTCTA                                                                                         |
| Primers for pTRC99a- <i>uvrY</i>         |     |                                                                                                                |
| <i>uvrY</i>                              | F   | CCGGAATTCGCCCCGATTGTTTCGGGTTAATT                                                                               |
| <i>uvrY</i>                              | R   | CGCGGATCCTCACTGACTTGATAATGTCTCCGC                                                                              |
| Primers for <i>uvrY</i> -3×FLAG          |     |                                                                                                                |
| <i>uvrY</i>                              | F   | CCGGAATTCTTGATCAACGTTCTACTTGTTGAT                                                                              |
| <i>uvrY</i>                              | R   | CGCGGATCCTTACTATTTATCGTCGTCATCTTTGTAGTCGATAT<br>CATGATCTTTATAATCACCGTCATGGTCTTTGTAGTCCTGACTT<br>GATAATGTCTCCGC |
| Primers for pET28a- <i>uvrY</i>          |     |                                                                                                                |
| <i>uvrY</i>                              | F   | GGAATTCATATGTTGATCAACGTTCTACTTGTTGAT                                                                           |
| <i>uvrY</i>                              | R   | CCGCTCGAGTCACTGACTTGATAATGTCTCCGC                                                                              |
| Primers for plasmid identifying          |     |                                                                                                                |
| pKD46                                    | F   | TGAAATGCCCGTTTACCT                                                                                             |

|                            |   |                             |
|----------------------------|---|-----------------------------|
| pKD46                      | R | GCCCCGACTGATACGTTGA         |
| pTrc99a                    | F | TGGCTGTGCAGGTCGTAAATC       |
| pTrc99a                    | R | CCACACTACCATCGGCGCTA        |
| pET28a                     | F | TAATACGACTCACTATAGGG        |
| pET28a                     | R | GCTAGTTATTGCTCAGCGG         |
| Primers for WT identifying |   |                             |
| <i>wzx</i>                 | F | CTTGGTGCTGCTCTGACATT        |
| <i>wzx</i>                 | R | AATCGTAAGAGGGACCGTAGA       |
| <i>fliC</i>                | F | TCACAGTTGGCGGCGTAG          |
| <i>fliC</i>                | R | CATCAGCATGAAGGGTGGC         |
| Primers for CHIP-qPCR      |   |                             |
| P <sub>LEE1</sub>          | F | GCTTGGTTTTTATTCTGTTTTATTGT  |
| P <sub>LEE1</sub>          | R | ACATCTATTTTCATCAAACAACCACC  |
| P <sub>LEE2/3</sub>        | F | ATTTCCCAATAATCTTAAAACTCTTC  |
| P <sub>LEE2/3</sub>        | R | AATCACTCCTGTCTTCTCATCCAC    |
| P <sub>LEE4</sub>          | F | CCGATTACGCATCGCACC          |
| P <sub>LEE4</sub>          | R | CATTAGCCATTGGAACTCACG       |
| P <sub>LEE5</sub>          | F | ATGTTTCAGCCGTTTATCGACTAC    |
| P <sub>LEE5</sub>          | R | GGGATTATGACCAAGATTACCAA     |
| P <sub>csrC</sub>          | F | ATGTTTCAGCCGTTTATCGACTAC    |
| P <sub>csrC</sub>          | R | GGGATTATGACCAAGATTACCAA     |
| <i>rpoS</i>                | F | GTTATCGCAGGGAGCCACA         |
| <i>rpoS</i>                | R | TTTTACCACCAGACGCAAGTTA      |
| Primers for EMSA           |   |                             |
| P <sub>LEE1</sub>          | F | CGCTTACCCCAATCACTTAC        |
| P <sub>LEE1</sub>          | R | TCATAATAAATAATCTCCGC        |
| P <sub>LEE2/3</sub>        | F | CATTACTGCACCAGAAGGAC        |
| P <sub>LEE2/3</sub>        | R | AGATTCATCTGCAGGCTCTG        |
| P <sub>LEE4</sub>          | F | CGCATCGCACCATTGAGAAG        |
| P <sub>LEE4</sub>          | R | CATTAGCCATTGGAACTCACG       |
| P <sub>LEE5</sub>          | F | TAGTTTGCTTAATTGGTTTTCTTTGGC |
| P <sub>LEE5</sub>          | R | ACCAATAGGCATAAATATCTC       |
| <i>rpoS</i>                | F | GTTATCGCAGGGAGCCACA         |
| <i>rpoS</i>                | R | TTTTACCACCAGACGCAAGTTA      |

|                                                 |   |                           |
|-------------------------------------------------|---|---------------------------|
| <i>P<sub>csrC</sub></i>                         | F | AAGCGGTCGTCTCCGTCAGTCAAA  |
| <i>P<sub>csrC</sub></i>                         | R | GGGTGCTACTTTACGCCTTTGCTT  |
| Primers for qRT-PCR                             |   |                           |
| <i>rrsH</i>                                     | F | GAAAGCGTGGGGAGCAAAC       |
| <i>rrsH</i>                                     | R | ACATGCTCCACCGCTTGTG       |
| <i>eae</i>                                      | F | GACGGTAGTTCCTGACTTCTT     |
| <i>eae</i>                                      | R | TCGCCACCAATACCTAAACG      |
| <i>tir</i>                                      | F | AAAGCAGCAGGCGAAGAGG       |
| <i>tir</i>                                      | R | TCGGCACCTGCGAATCAT        |
| <i>ler</i>                                      | F | CAGGAAGCAAAGCGACTG        |
| <i>ler</i>                                      | R | ACCAGGTCTGCCCTTCTT        |
| <i>escC</i>                                     | F | GCAATAGATGCGGCTGGAC       |
| <i>escC</i>                                     | R | TCGGCTTGTAATGGTAATATCTCG  |
| <i>escN</i>                                     | F | AGGTTTTCTTGTTGCCTTTTGA    |
| <i>escN</i>                                     | R | TCTCCATTGGTCTGCCTATGC     |
| <i>espB</i>                                     | F | AAAACCTCTCGGCAAGATGG      |
| <i>espB</i>                                     | R | AATAATCCCGCCAACCAAAG      |
| <i>escT</i>                                     | F | GCAATAGATGCGGCTGGAC       |
| <i>escT</i>                                     | R | TCGGCTTGTAATGGTAATATCTCG  |
| Primers for verification of the RNA-seq results |   |                           |
| <i>ytfl</i>                                     | F | GTCGGGCAACTACGAAACCATC    |
| <i>ytfl</i>                                     | R | GCTTTCTTCTTTATCTTTAGCGTCA |
| <i>bssS</i>                                     | F | CAGACTCATCCGCTCGTAGGGT    |
| <i>bssS</i>                                     | R | TTTGGCGATTCTGCTTCTAAT     |
| <i>nirC</i>                                     | F | TACGAGCACTCCATCGCTAACAT   |
| <i>nirC</i>                                     | R | CTTTCGGCGTAGCATACCAATAAC  |
| <i>adiY</i>                                     | F | ATTATTATTCACGGTGCTATCC    |
| <i>adiY</i>                                     | R | TTTCTTTAACAGACTTGGGCTA    |
| <i>ybaA</i>                                     | F | AGCGATGTACCGGATGGCAAAG    |
| <i>ybaA</i>                                     | R | GGCATGGACTCGCCGAACCTT     |
| <i>bioC</i>                                     | F | ACGGCACTCCGCGAGCTGTATC    |
| <i>bioC</i>                                     | R | TGGCACTGAGCGCATCATCAAA    |
| <i>malF</i>                                     | F | GTCTGGACCGTGGTGTCTCGC     |
| <i>malF</i>                                     | R | AAGCTCTGGTTAAACAACCCCTTG  |

|             |   |                           |
|-------------|---|---------------------------|
| <i>purD</i> | F | GATCGACAAACAGGGCAATCCG    |
| <i>purD</i> | R | ATCCACCCGCAGCCATCACCAC    |
| <i>cyoB</i> | F | CACCGCTATCGGGAATAGAGTAC   |
| <i>cyoB</i> | R | GCACAGTGATGCCCAGGTAAAT    |
| <i>sdhB</i> | F | AGGATTACACCCTGGAAGCGGAAGA |
| <i>sdhB</i> | R | GTAAACCTGGCAGCGGGCGAAT    |
