# Supplementary material for: A Novel Role of the Two-Component System Response Regulator UvrY in Enterohemorrhagic Escherichia coli O157:H7 Pathogenicity Regulation
Source: MDPI journal article supplement (doi:10.3390/ijms24032297), 2023-01-24
Supplement: s1 [file s1]

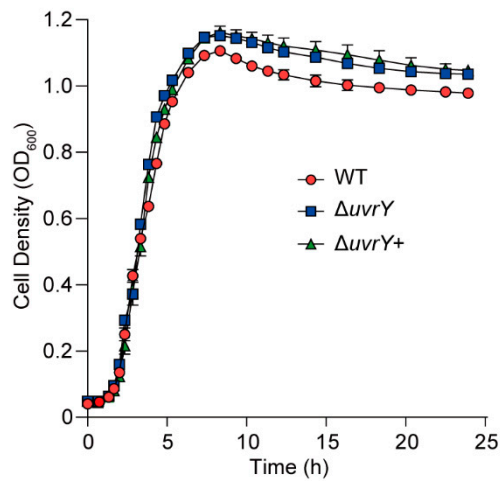

**Figure S1.** The growth curves of WT,  $\Delta uvrY$ , and  $\Delta uvrY+$  strains in LB broth ( $n=3$ ).

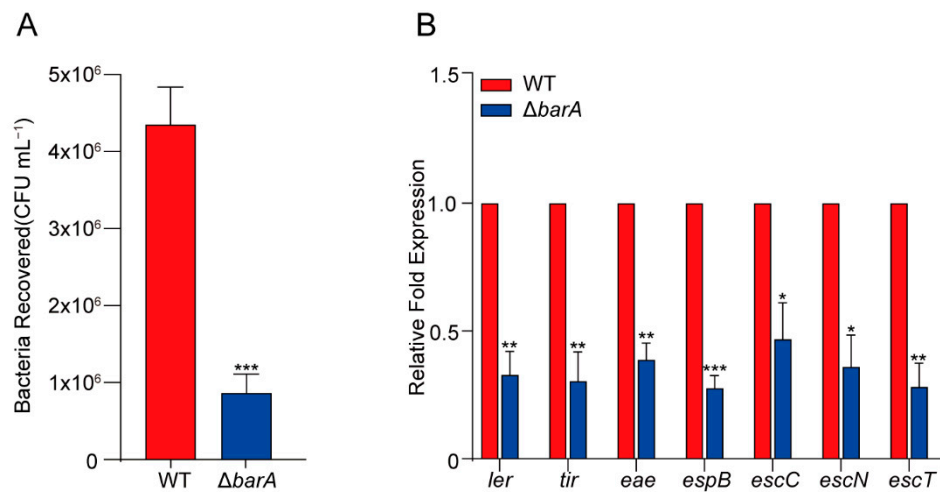

**Figure S2.** BarA positively affects the virulence of EHEC O157:H7. (A) Adhesion of WT and  $\Delta barA$  to HeLa cells. (B) qRT-PCR of LEE genes expression changes in WT and  $\Delta barA$  strains.

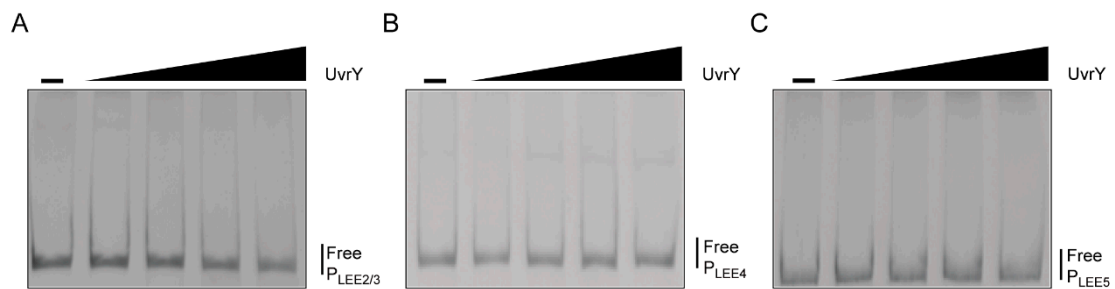

**Figure S3.** EMSA showing the in-vitro UvrY binding activity. (A–C) Chemiluminescence photographs showing the EMSA result for the binding affinity of protein UvrY-His6 with (A) the LEE2/3 promoter;  $P_{LEE2/3}$ , (B) LEE4 promoter;  $P_{LEE4}$  and (C) LEE5 promoter;  $P_{LEE5}$ . 30 ng of PCR products were added to each DNA and UvrY-his6 protein reaction mixtures from lane 1-5 in A-C. No protein was added to lane 1, while lane 2-5 contains reaction mixtures with UvrY-his6 protein concentrations from low to high, accordingly.

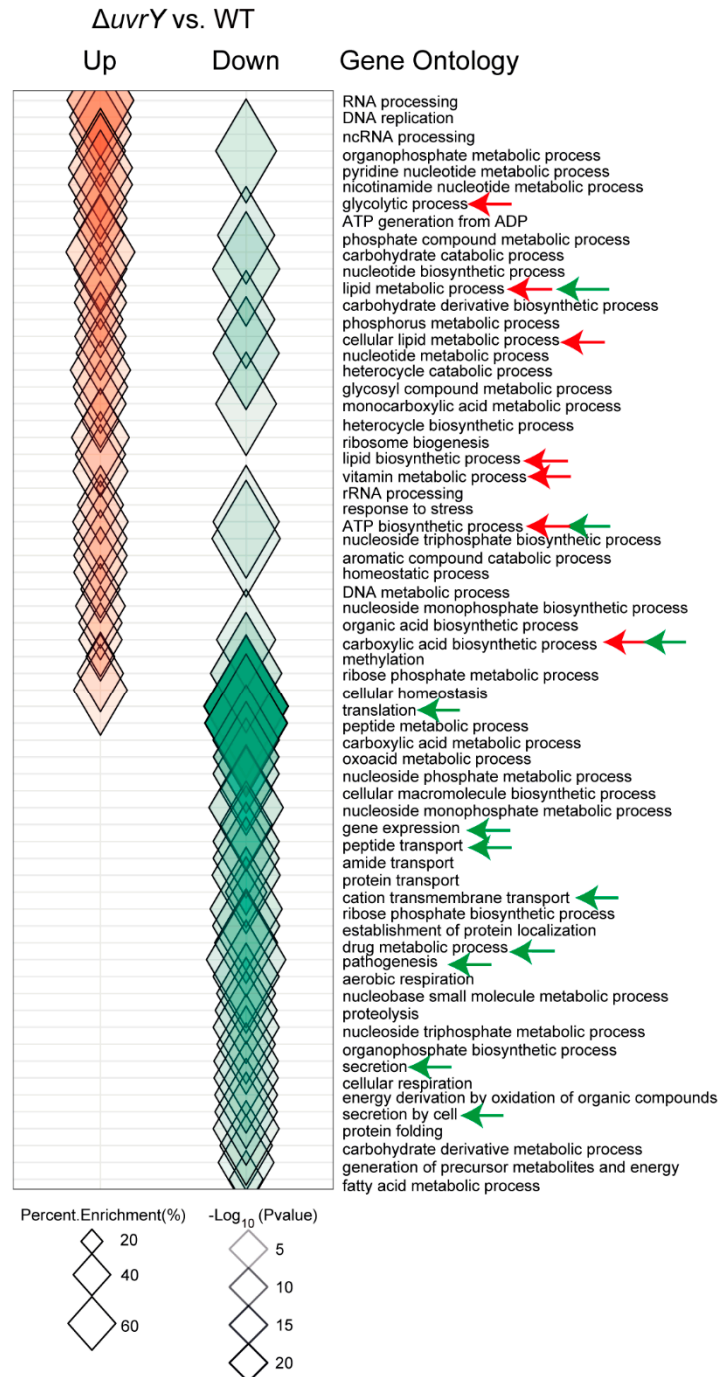

**Figure S4.** GO analysis of UvrY-regulated genes in EHEC O157:H7. Bubble plots showing the enriched GO results for down- and up-expressed genes in  $\Delta uvrY$  strains compared with WT.

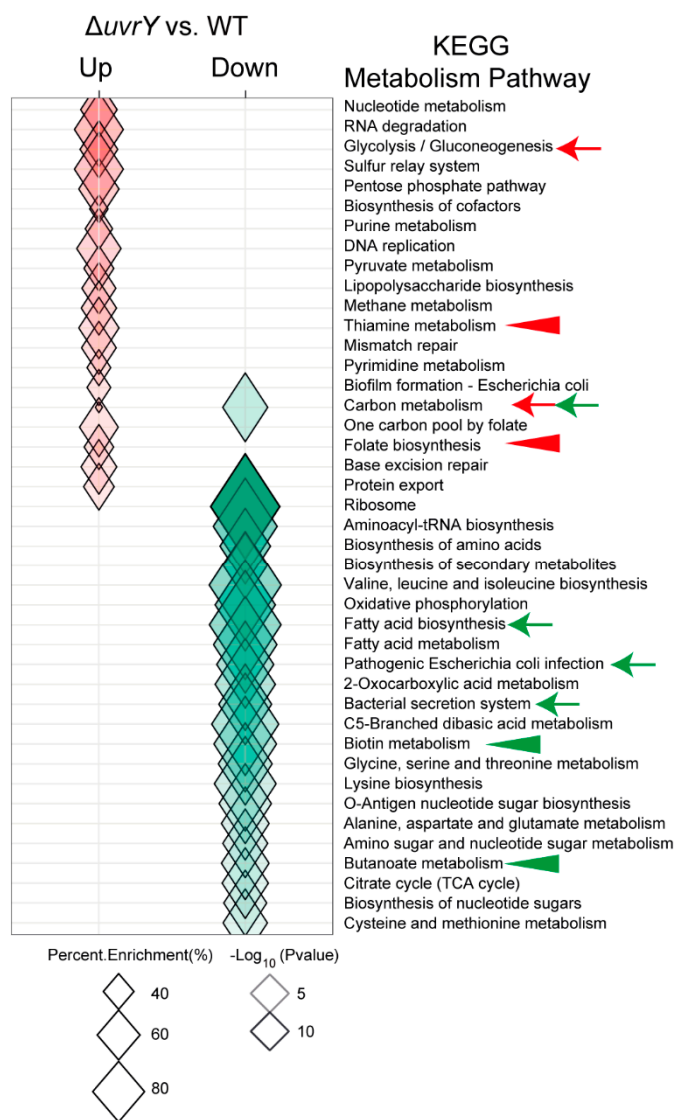

**Figure S5.** KEGG analysis of UvrY-regulated genes in EHEC O157:H7. Bubble plots showing the KEGG Pathway enrichment results for down- and up-expressed genes in  $\Delta uvrY$  strains compared with WT.
